# Supplementary material for: Biomolecule-mediated hydrothermal synthesis of polyoxoniobate–CdS nanohybrids with enhanced photocatalytic performance for hydrogen production and RhB degradation
Source: Royal Society of Chemistry journal article supplement (doi:10.1039/c7dt01729d), 2017-01-01
Supplement: c7dt01729d1.pdf [file c7dt01729d1.pdf]

## Supporting information

### Biomolecule-mediated hydrothermal synthesis of polyoxoniobate-CdS nanohybrids with enhanced photocatalytic performance for hydrogen production and RhB degradation

Meiying Liu\*, Hong Chen, Hongmei Zhao, Yunfei He, Yunhe Li, Ran Wang, Lancui Zhang\* and Wansheng You\*

*School of Chemistry and Chemical Engineering, Liaoning Normal University, Dalian, Liaoning 116029, China.*

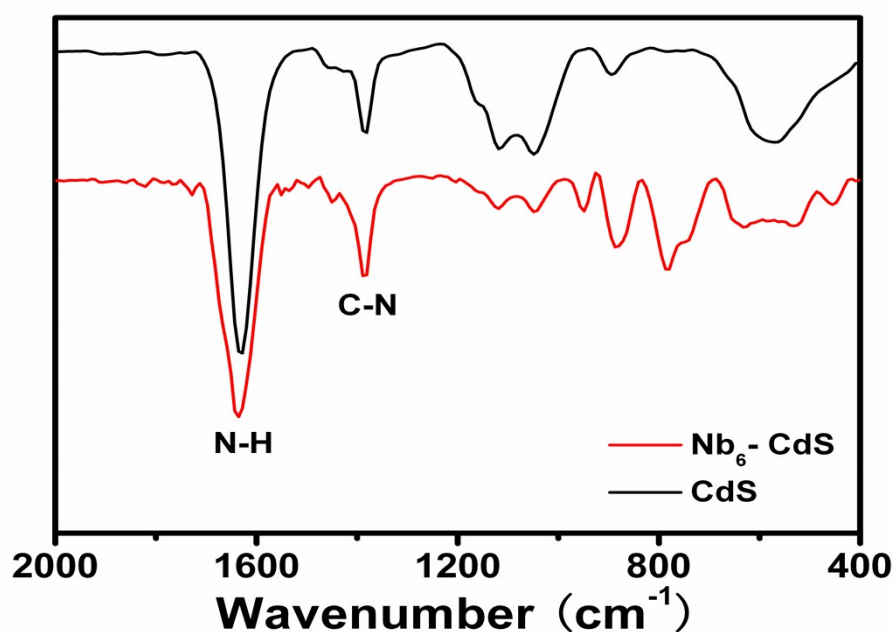

**Fig. S1.** FT-IR spectra of CdS and Nb<sub>6</sub>-CdS nanohybrids.

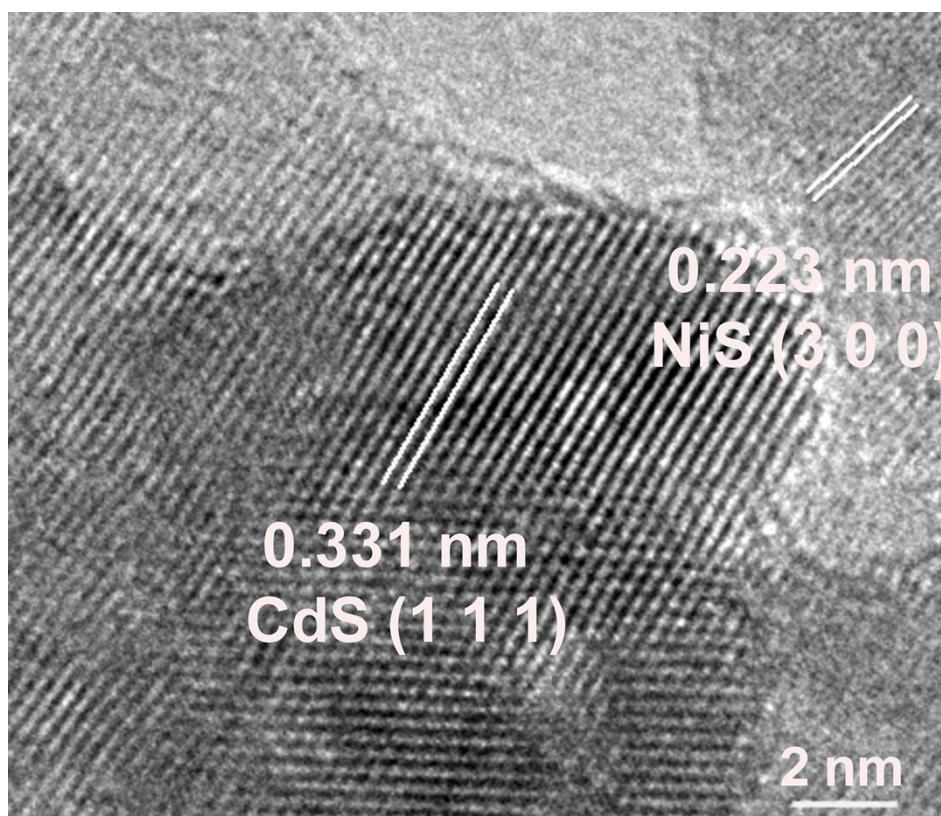

**Fig. S2.** HRTEM image of NiS/Nb<sub>6</sub> - CdS composite.

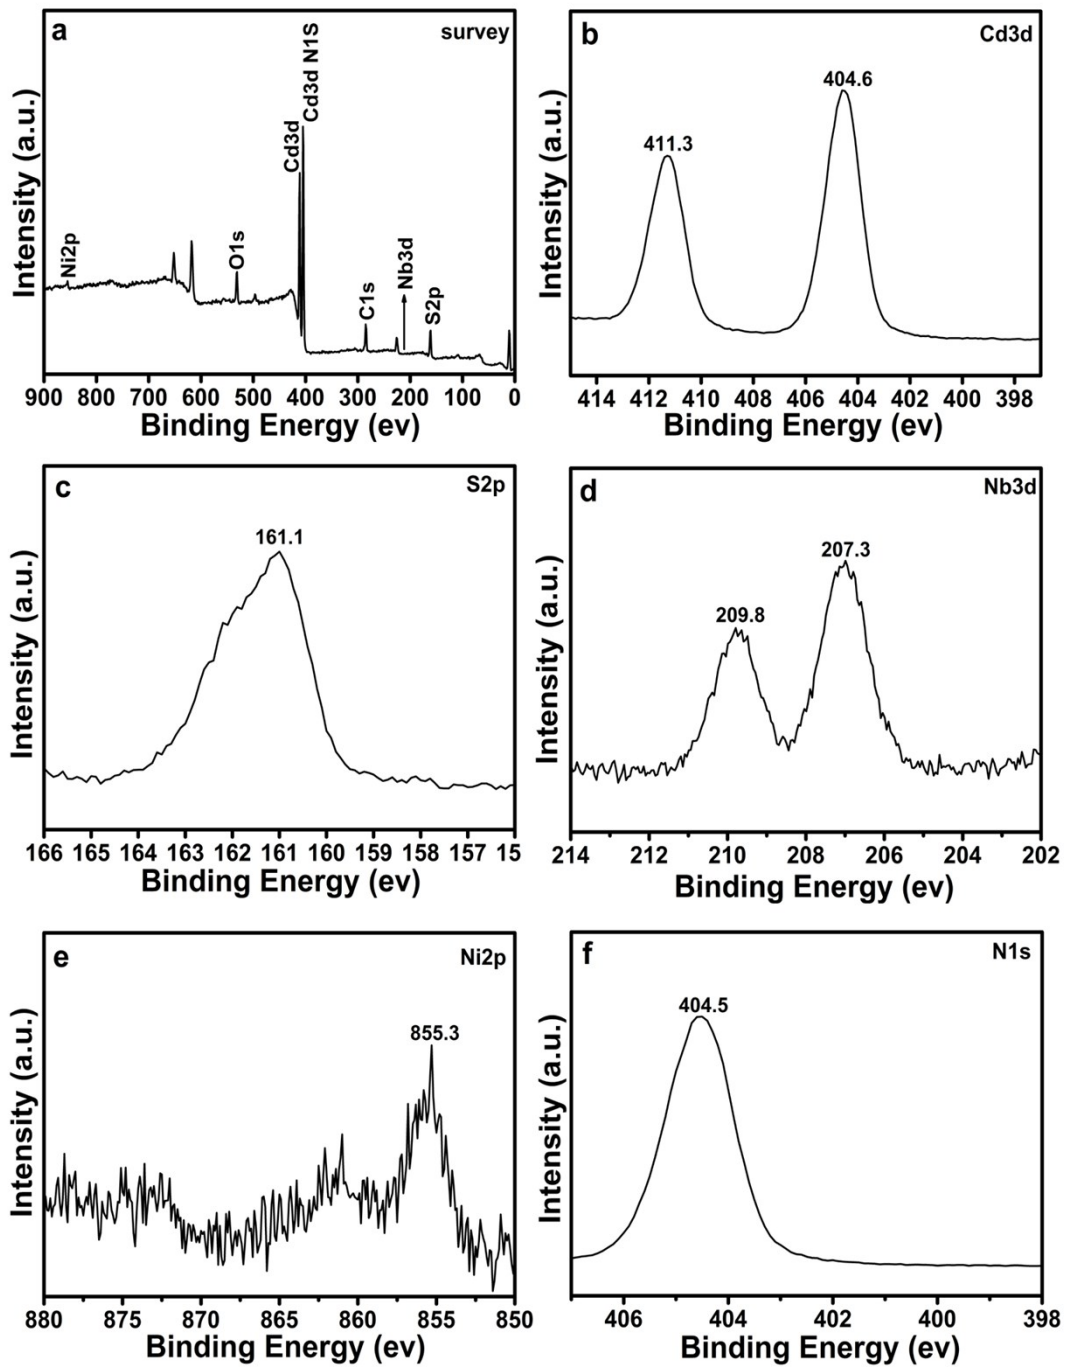

**Fig. S3.** XPS data of NiS/Nb<sub>6</sub> - CdS composite: (a) survey spectrum, and high resolution XPS spectra of : (b) Cd 3d, (c) S 2p, (d) Nb 3d, (e) Ni 2p, and (f) N 1s.

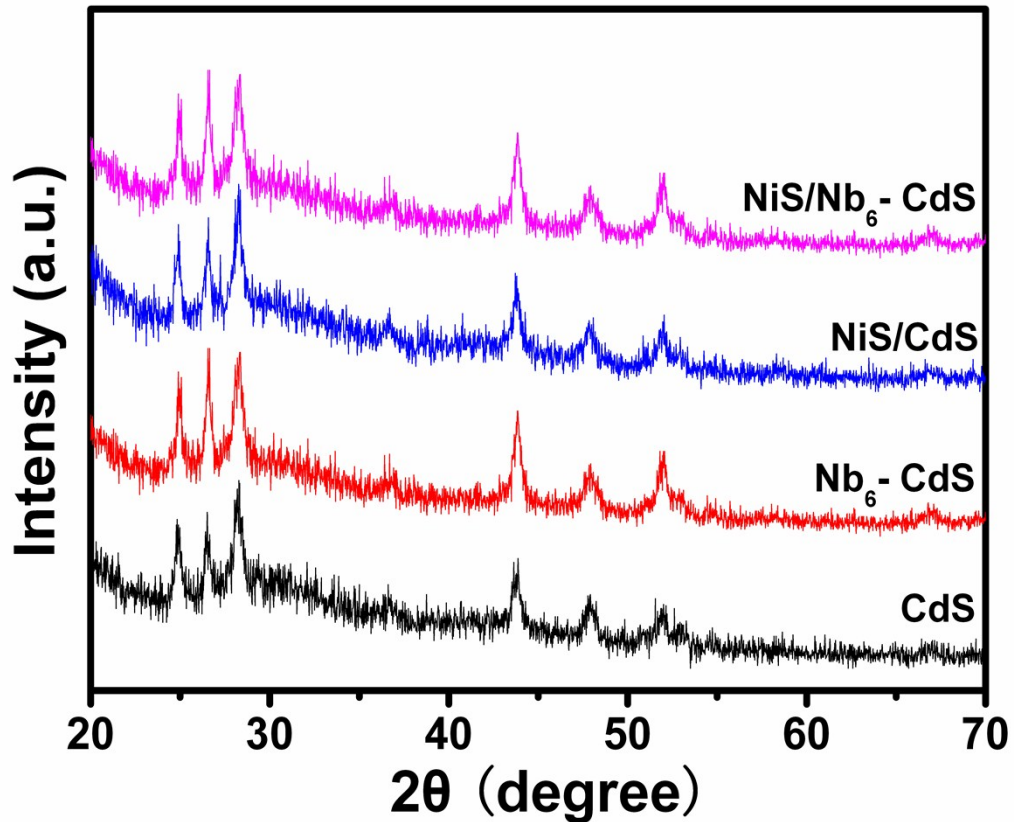

**Fig. S4.** XRD patterns of CdS, Nb<sub>6</sub> – CdS, NiS/CdS and NiS/Nb<sub>6</sub> - CdS powder samples.
